# Supplementary material
Source: Springer Nature journal article supplement (https://www.springermedizin.de/resource/supplementary/12911_2013_797_MOESM3_ESM.pdf/9526676)

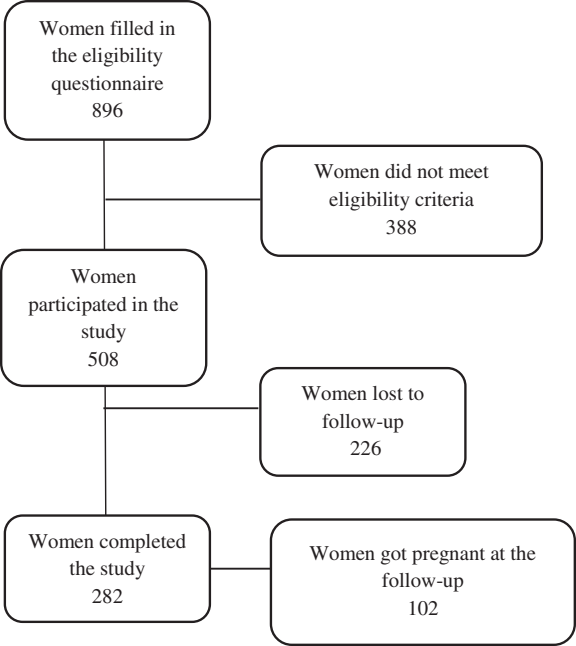

Supplement: MOESM3 [file 9526676]
